# Supplementary material
Source: MDPI journal article supplement (https://www.mdpi.com/2073-4352/11/7/825)
Supplement: s1 [file s1]

# Supplementary material for Synthesis, magnetic, optical, and thermodynamic properties of rocksalt $\text{Li}_{1.3}\text{Nb}_{0.3}\text{Mn}_{0.4}\text{O}_2$ cathode material for Li-ion batteries

The molar susceptibility  $\chi_m$  versus the temperature (Figure S1a) shows an anomaly which is clear in the plot of the inverse of molar susceptibility ( $1/\chi_m$ ) versus the temperature (Figure S1b). Above the transition temperature of 6.48, the curve was fitted with Curie-Weiss law.

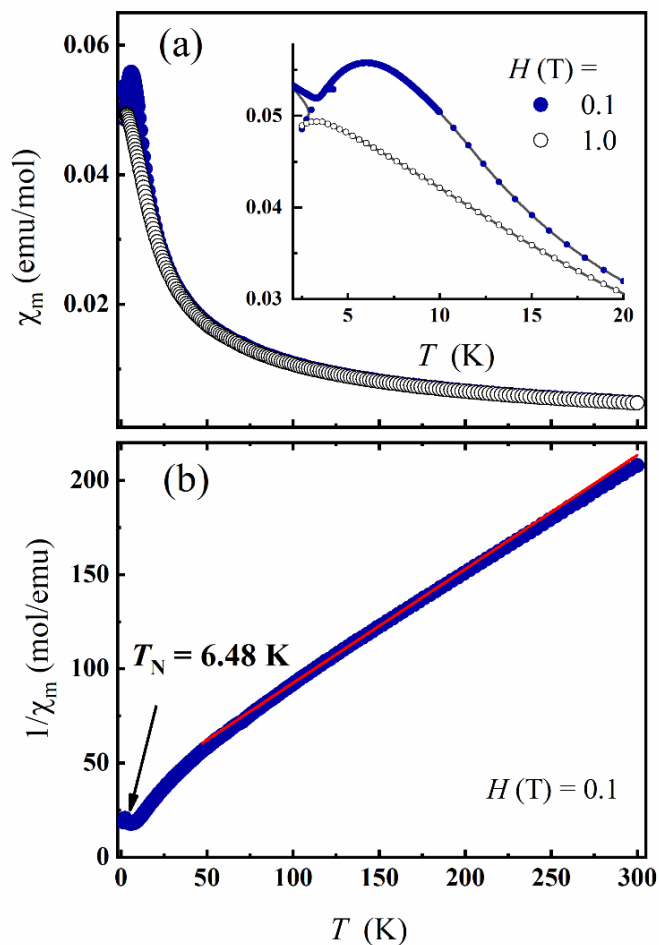

**Figure S1.** (a) The molar susceptibility and versus the temperature at the magnetic field of 0.1, 1 T. (b) The inverse of molar susceptibility and versus the temperature of  $\text{Li}_{1.3}\text{Nb}_{0.3}\text{Mn}_{0.4}\text{O}_2$  at the magnetic field of 0.1 T, the red line indicates the Curie-Weiss fitting.

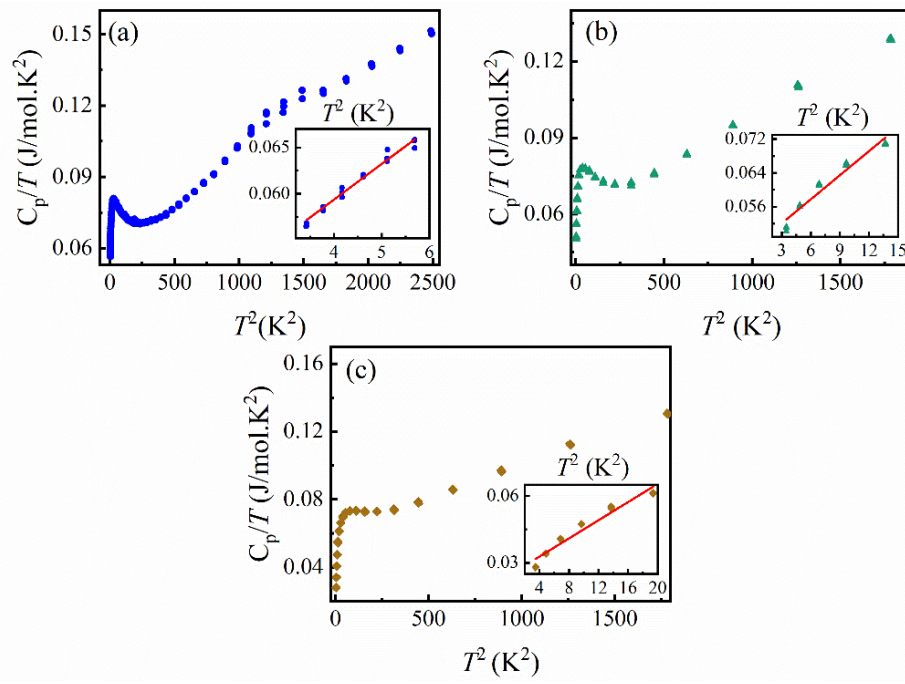

**Figure S2.** The specific heat per temperature as a function of the square of temperature at (a) 0 T, (b) 1 T, and (c) 9 T, the inset indicates the fitting with equation 2 at low temperatures.
